# Supplementary material for: Highly selective CO2separation from a CO2/C2H2mixture using a diamine-appended metal–organic framework
Source: Royal Society of Chemistry journal article supplement (doi:10.1039/d1ta05869j), 2021-01-01
Supplement: d1ta05869j1.pdf [file d1ta05869j1.pdf]

Electronic Supplementary Information

## **Highly selective CO<sub>2</sub> separation from a CO<sub>2</sub>/C<sub>2</sub>H<sub>2</sub> mixture using a diamine-appended metal-organic framework**

Doo San Choi,<sup>a</sup> Dae Won Kim,<sup>a</sup> Dong Won Kang,<sup>a</sup> Minjung Kang,<sup>a</sup> Yun Seok Chae,<sup>a</sup> and Chang Seop Hong\*

<sup>a</sup>Department of Chemistry, Korea University, Seoul 02841, Republic of Korea.  
E-mail: cshong@korea.ac.kr

## Experimental Section

### Materials.

Most of the chemicals and solvents used in this experiment were purchased from commercial companies (Sigma Aldrich, Daejung Chemicals, and TCI). All solvents were of reagent grade ( $\geq 99.0\%$ ) and were used without further purification. Ethylenediamine (en,  $\geq 98.0\%$ ), N-ethylethylenediamine (een,  $\geq 98.0\%$ ), and N-methylethylenediamine (nmen,  $\geq 95.0\%$ ) were purchased from Sigma-Aldrich and used without purification.  $H_4dobpdc$  ( $dobpdc^{4-} = 4,4'$ -dioxido-3,3'-biphenyldicarboxylate) was synthesized according to the previous literature.<sup>1</sup>

### Synthesis of $Mg_2(dobpdc)$ .

$Mg_2(dobpdc)$  was prepared by a microwave-assisted synthesis from  $MgCl_2 \cdot 6H_2O$  (284.6 mg, 1.400 mmol) and  $H_4dobpdc$  (128 mg, 0.467 mmol) in 16 mL of a mixed solvent (DMF/EtOH = 1:1). The mixture was loaded in a 35 mL cell and reacted in a microwave reactor (CEM Discover) for 20 min at 130 °C and 200 psi. After the reaction, the white powder was obtained. The white powder was separated through filtration and washed with DMF and MeOH several times.  $Mg_2(dobpdc)$  was dried in vacuum for 6 h.

### Synthesis of diamine- $Mg_2(dobpdc)$ (diamine-MOF; diamine = en, nmen, een).

Before the functionalization of diamine,  $Mg_2(dobpdc)$  was soaked in MeOH for 1 d at room temperature to replace the DMF molecules coordinated to the open metal sites with the readily removable MeOH. The absence of the C=O stretching vibration of DMF at  $1663\text{ cm}^{-1}$  in the IR spectrum suggests the complete removal of DMF from  $Mg_2(dobpdc)$  (for IR spectra, please see Figure S1). 100 mg of MeOH-solvated  $Mg_2(dobpdc)$  was placed in a 20 mL vial. Excess diamine (50 eq.) was mixed with 10.0 mL of toluene, which was placed in a 20 mL vial containing MeOH-solvated  $Mg_2(dobpdc)$ . The 20 mL vial was closed with a Teflon cap and sonicated at 60 °C for 3 h. The white powder was separated through filtration and washed with toluene and hexane several times.

### Digestion $^1H$ NMR.

Diamine-MOF was activated for 1 h in vacuum at 140 °C using a heating mantle to remove residual diamine from the pores. A sample (5 mg) was mixed with DMSO (0.5 mL) and then two drops of deuterium chloride solution (35 wt. % in  $D_2O$ ) was added. When the sample became transparent

after about 30 min, it was placed in an NMR tube. Digestion  $^1\text{H}$  NMR were recorded on Bruker AVANCE III 500 MHz NMR system.

### **Physical measurements.**

IR spectra were obtained using a Nicolet iS10 FT-IR spectrometer. Powder X-ray diffraction (PXRD) patterns were obtained using Cu  $K\alpha$  radiation ( $\lambda = 1.5406 \text{ \AA}$ ) on a Rigaku Ultima III diffractometer with a scan speed of  $5^\circ \text{ min}^{-1}$  and a step size of  $0.02^\circ$ . Thermogravimetric analyses (TGA) were performed with a ramp rate of  $2^\circ \text{ C min}^{-1}$  up to  $900^\circ \text{ C}$  in an  $\text{N}_2$  (99.999%) flow using a TA instruments Discovery TGA.

### **Gas adsorption measurements.**

Gas sorptions with  $\text{CO}_2$  (99.999%),  $\text{C}_2\text{H}_2$  (99.999%) and  $\text{N}_2$  (99.999%) were performed using a Micromeritics 3flex instrument and ASAP 2020 instrument after the pretreatment of each sample.

### **Calculations of IAST selectivity and isosteric heats of adsorption.**

Gas adsorption isotherms and gas selectivities for  $\text{CO}_2$  and  $\text{C}_2\text{H}_2$  at 293 K were calculated based on the ideal adsorbed solution theory (IAST) proposed by Myers and Prausnitz.<sup>2</sup> In order to predict the sorption performances of  $\text{Mg}_2(\text{dobpdc})$  and diamine-MOFs for the separation of binary mixed gases, the single-component adsorption isotherms were first fit to a Dual Site Langmuir Freundlich model (DSLFF), as below:

$$n(P) = \frac{q_1(k_1P)^{n_1}}{1 + (k_1P)^{n_1}} + \frac{q_2(k_2P)^{n_2}}{1 + (k_2P)^{n_2}}$$

Where  $n(P)$  is the amount of adsorbed gas,  $P$  is the equilibrium pressure and  $q_1$ ,  $q_2$ ,  $k_1$ ,  $k_2$ ,  $n_1$  and  $n_2$  are constants.

The adsorption selectivity,  $S_{i,j}$  is defined as :

$$S_{i,j} = \frac{x_i/x_j}{y_i/y_j}$$

where  $x_i$  and  $x_j$  are the gas uptake capacity at the adsorbed equilibrium of components  $i$  and  $j$  respectively. The gas molar fractions the  $i$  and  $j$  components are represented by  $y_i$  and  $y_j$ , respectively.

The isosteric heat,  $Q_{st}$ , is defined as :<sup>3, 4</sup>

$$Q_{st} = RT^2 \left( \frac{\partial \ln P}{\partial T} \right)$$

The gas adsorption isotherms obtained at 298 and 323 K were fitted by the Dual Site Langmuir Freundlich model (DSLFF), respectively.

### **GCMC simulation.**

Grand canonical Monte Carlo (GCMC) simulations were performed for the gas adsorption in the framework and the binding energy calculation by the Sorption module of Material Studio (Accelrys. Materials Studio Getting Started, release 2019).<sup>5</sup> The framework was considered to be rigid, and the optimized C<sub>2</sub>H<sub>2</sub> molecules were used. The partial charges for atoms of the framework were derived from QEq method. 2x2x2 unit cells were used during the simulations. The sorption geometries were optimized by Smart algorithm with ultra-fine quality. All parameters for the atoms were modeled with the universal force field (UFF) embedded in the MS modeling package. A cutoff distance of 18.5 Å was used for electrostatic interactions, and the simulation method of the interactions were calculated by using Ewald & Group summation. For each run, the  $2 \times 10^5$  maximum loading steps,  $2 \times 10^7$  production steps were employed.

### **Breakthrough experiments.**

The breakthrough curves of a mixed gas of CO<sub>2</sub>/C<sub>2</sub>H<sub>2</sub> (1:2, v/v) for een-MOF were performed by a BELCAT-II linked with BELMASS mass spectrometer. A fixed-bed column filled with the pelletized samples (425 – 600 μm) was prepared and the total gas flow rate was fixed to total 7 sccm for this measurement (CO<sub>2</sub>/C<sub>2</sub>H<sub>2</sub>/He = 1.5/3.0/2.5). Before breakthrough measurements, all samples were activated at 140 °C for 1 h. All outgas were continuously monitored by the mass spectrometer.<sup>6</sup> In case of the cyclic test, the samples were regenerated at 140 °C for 1 h before each cycle.

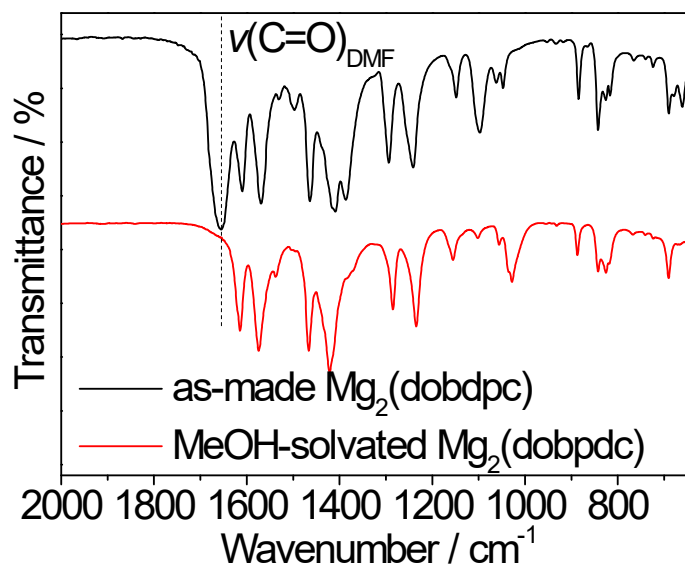

**Fig S1.** FT-IR data of as-made  $\text{Mg}_2(\text{dobpdc})$  and MeOH-solvated  $\text{Mg}_2(\text{dobpdc})$ .

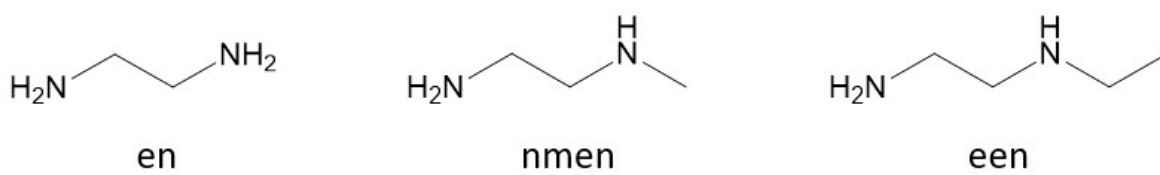

**Fig S2.** The structure of all diamines used in the experiments.

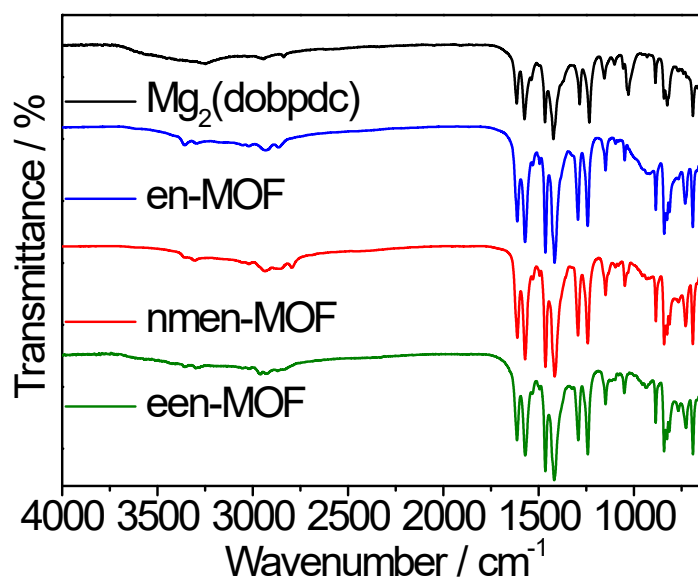

**Fig S3.** FT-IR data of Mg<sub>2</sub>(dobpdc), en-MOF, nmen-MOF, and een-MOF.

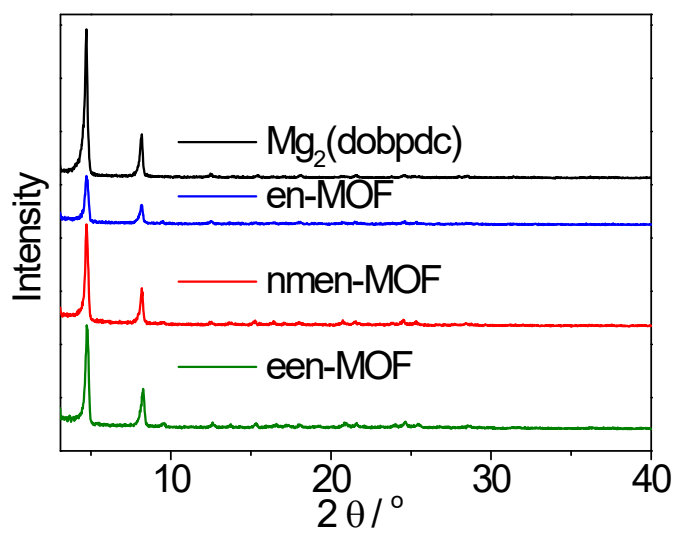

**Fig S4.** PXRD patterns of Mg<sub>2</sub>(dobpdc), en-MOF, nmen-MOF, and een-MOF.

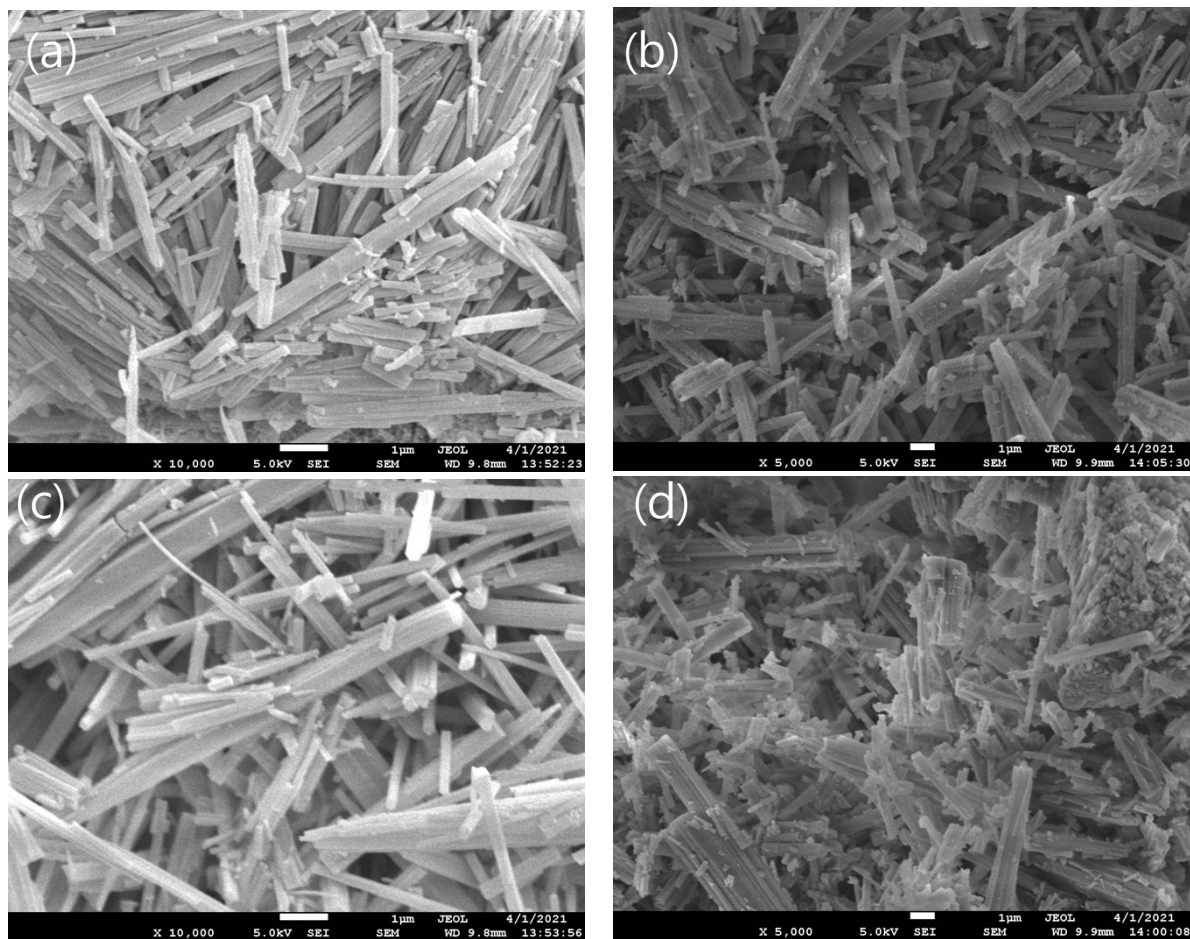

**Fig S5.** SEM images of (a)  $Mg_2(dobpdc)$ , (b) en-MOF, (c) nmen-MOF, and (d) een-MOF.

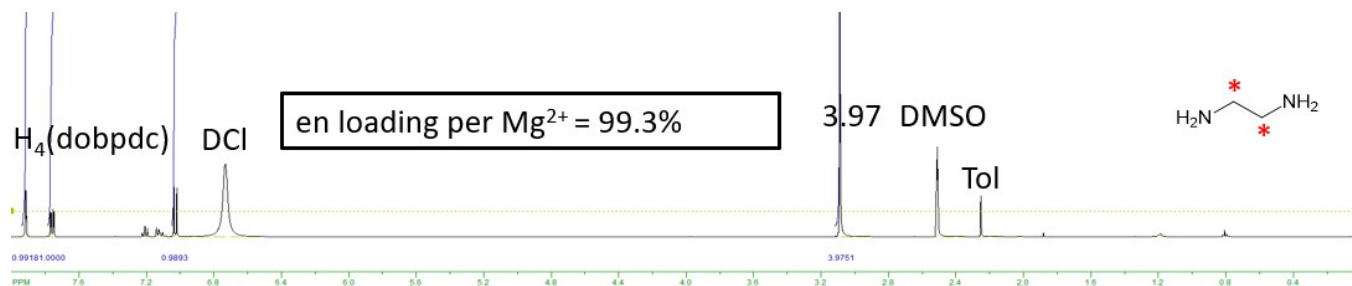

**Figure S6.** Digestion  $^1\text{H-NMR}$  of en-MOF.

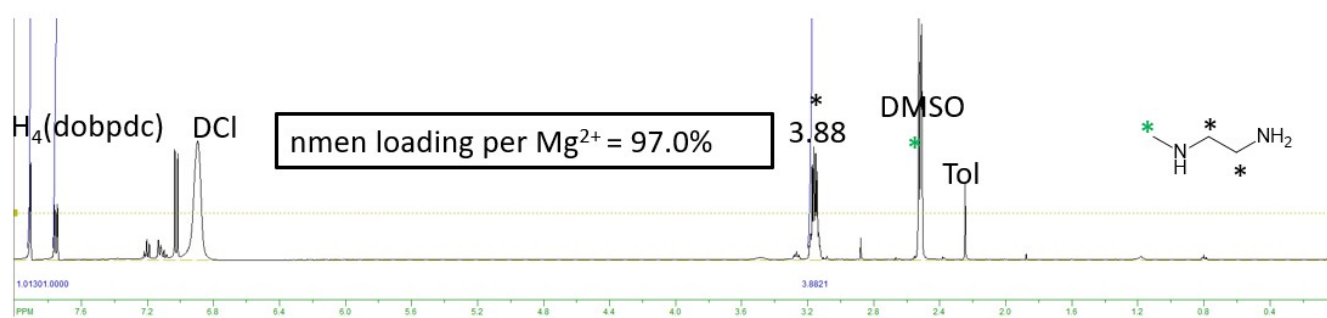

**Figure S7.** Digestion  $^1\text{H-NMR}$  of nmen-MOF.

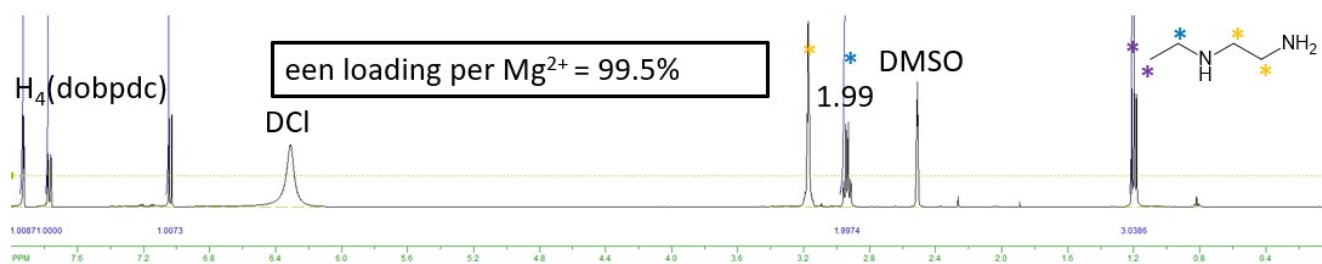

**Fig S8.** Digestion  $^1\text{H-NMR}$  of een-MOF.



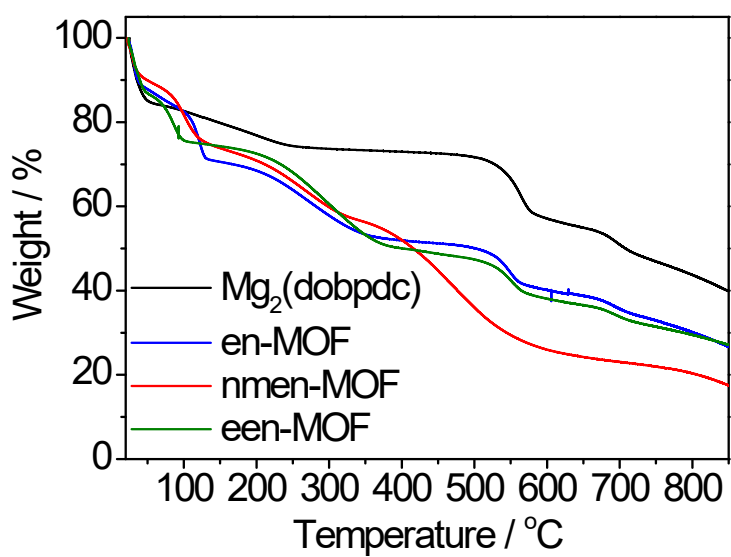

**Fig S9.** Thermogravimetric analysis of Mg<sub>2</sub>(dobpdc), en-MOF, nmen-MOF, and een-MOF.

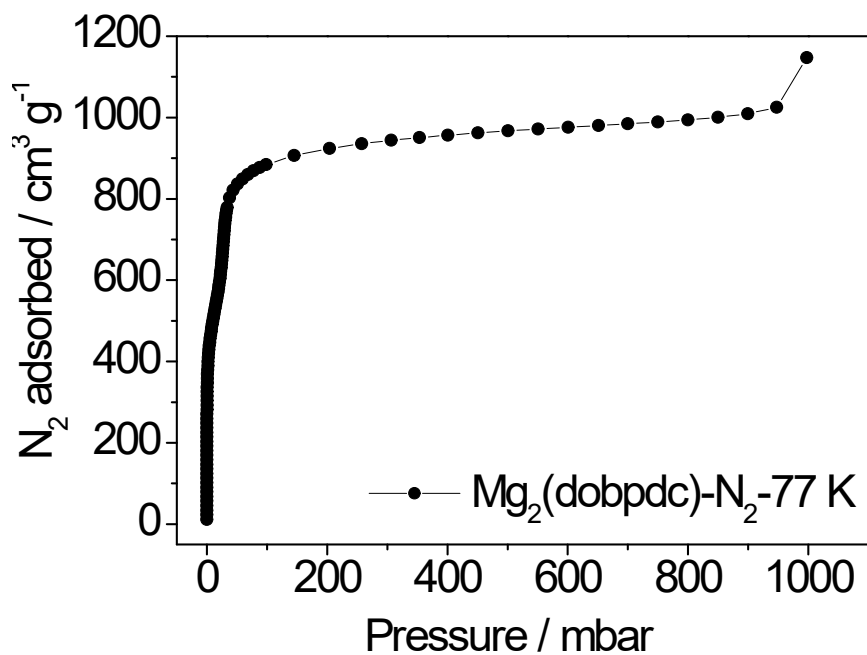

**Figure S10.**  $N_2$  sorption isotherm for  $Mg_2(dobpdc)$  at 77 K.

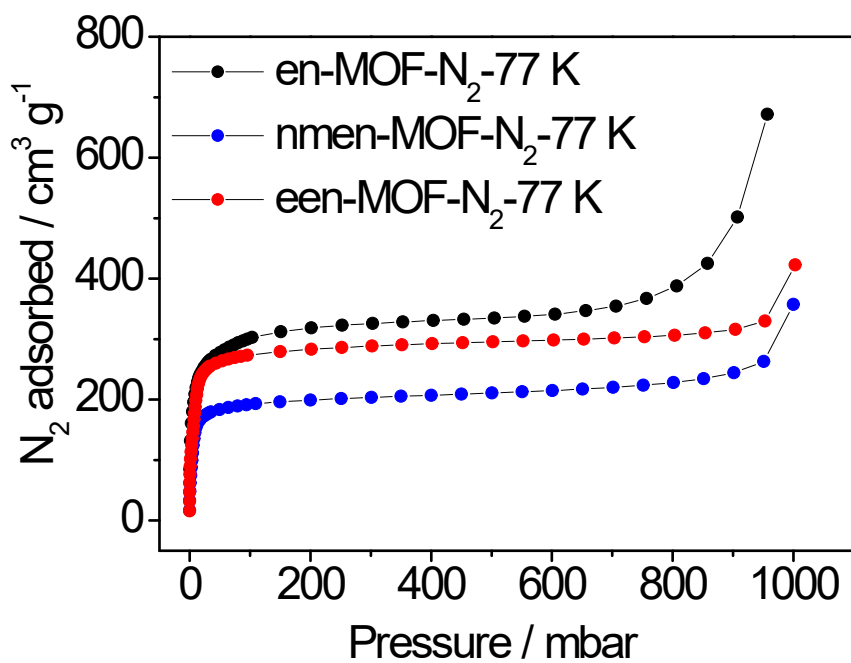

**Fig S11.**  $N_2$  sorption isotherms for en-MOF, nmen-MOF, and een-MOF at 77 K.

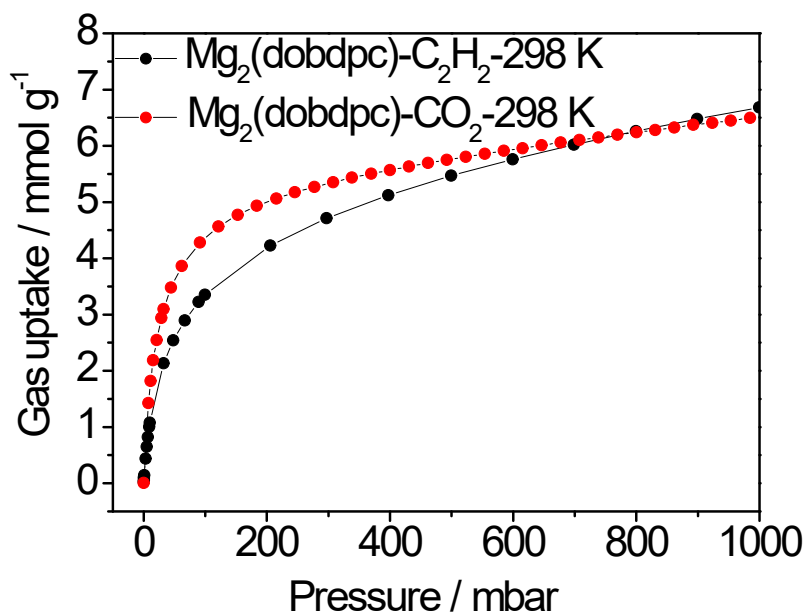

**Fig S12.** Experimental CO<sub>2</sub> and C<sub>2</sub>H<sub>2</sub> sorption isotherms for Mg<sub>2</sub>(dobdpc) at 298 K.

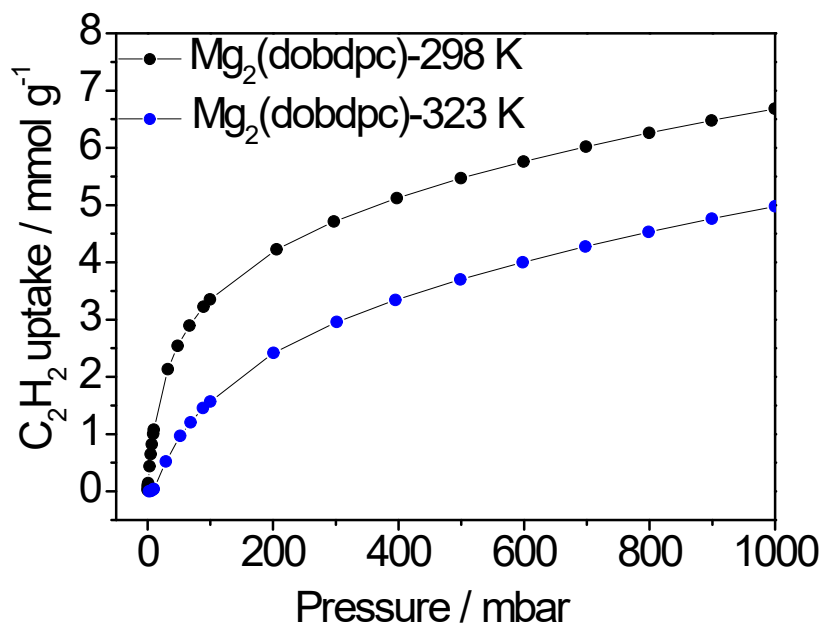

**Fig S13.** Experimental C<sub>2</sub>H<sub>2</sub> sorption isotherms for Mg<sub>2</sub>(dobdpc) at the indicated temperatures.

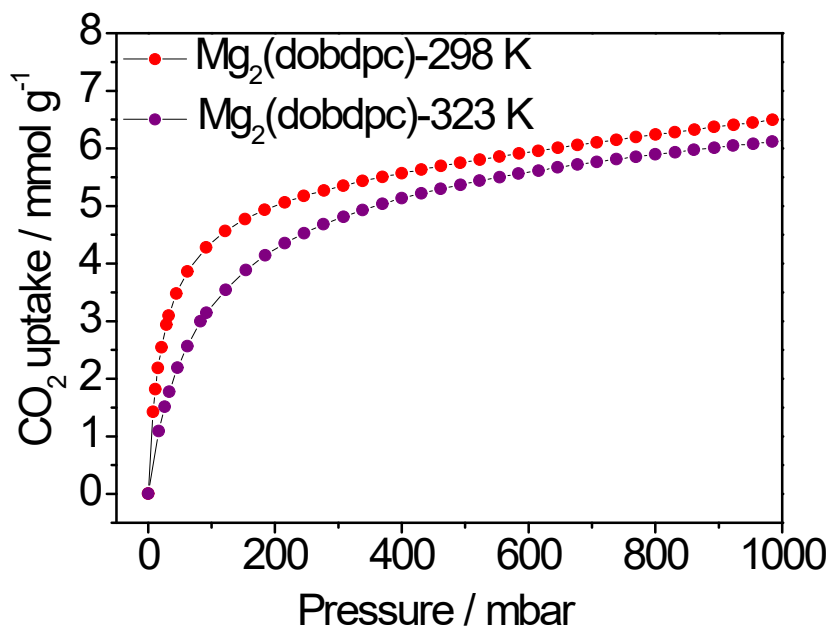

**Fig S14.** Experimental CO<sub>2</sub> sorption isotherms for Mg<sub>2</sub>(dobdpc) at the indicated temperatures.

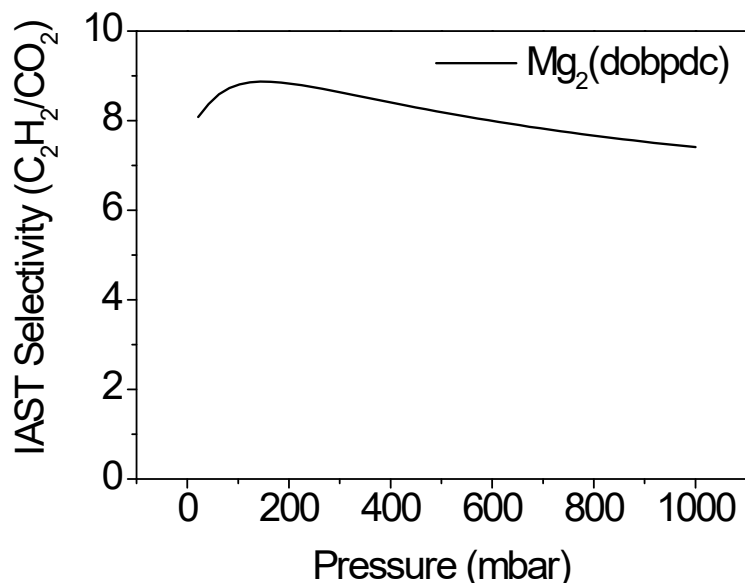

**Fig S15.** Calculated C<sub>2</sub>H<sub>2</sub>/CO<sub>2</sub> (2/1, v/v) IAST selectivity for Mg<sub>2</sub>(dobdpc) at 298 K.

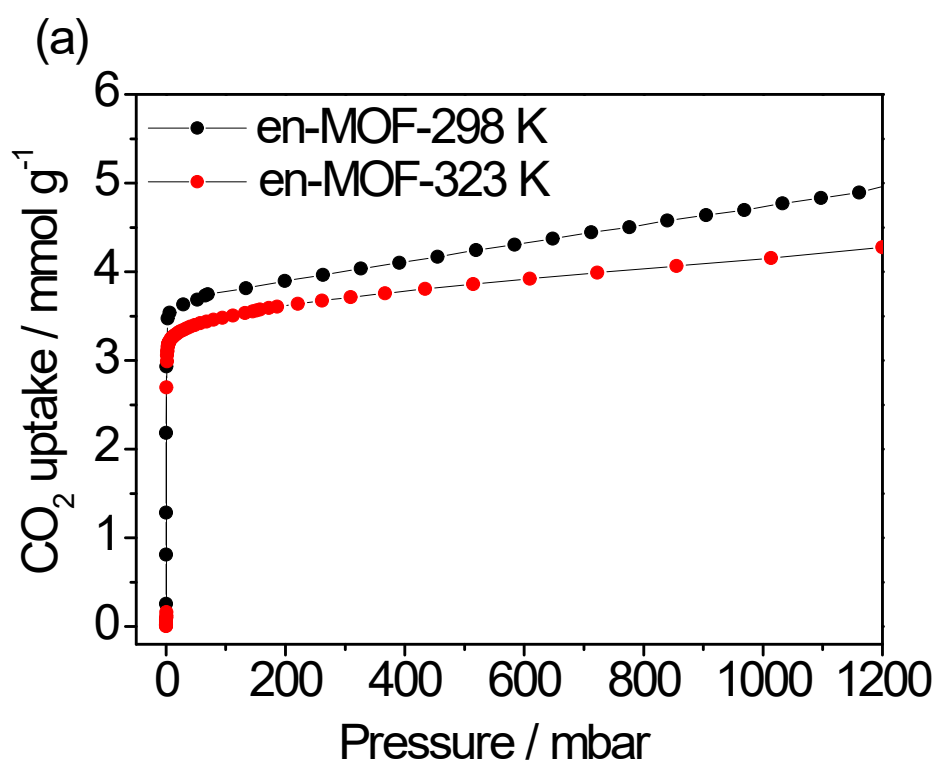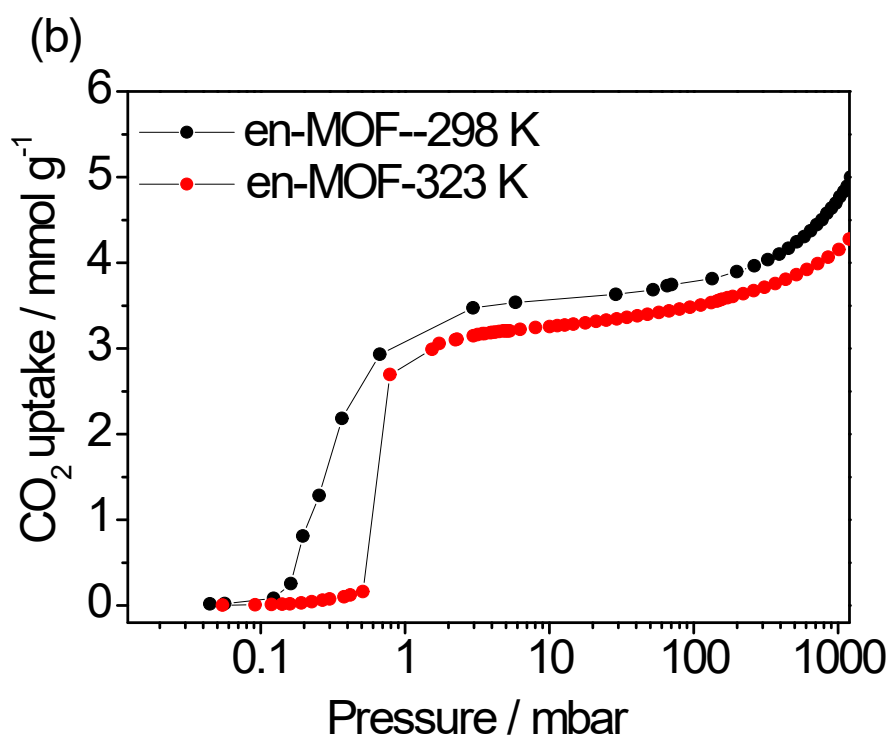

**Fig S16.** (a) Adsorption isotherms of CO<sub>2</sub> for en-MOF at the indicated temperatures. (b) Logarithmic-scale plot of (a).

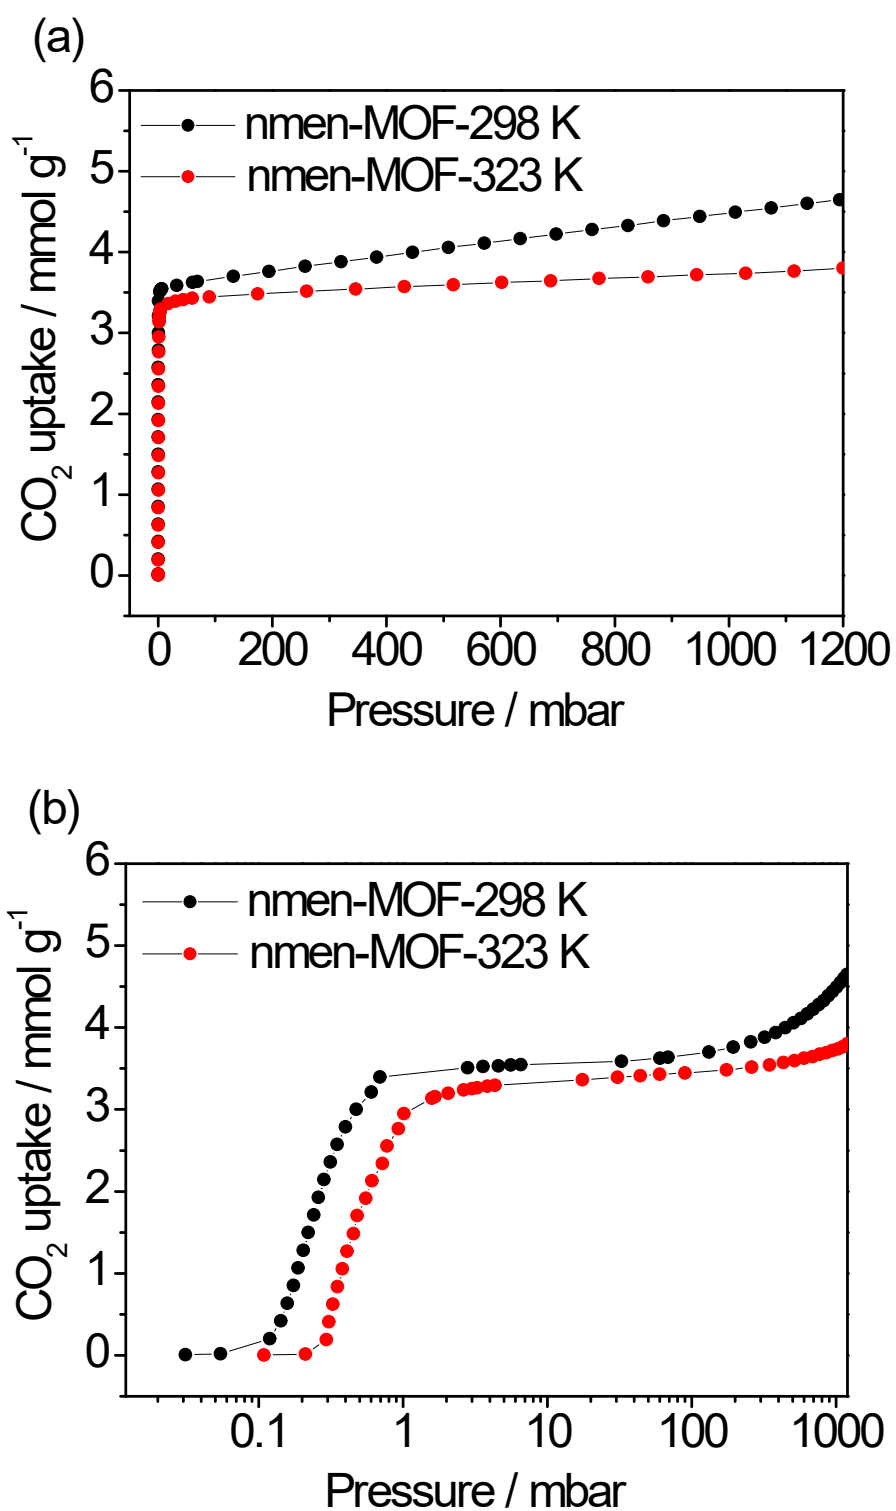

**Fig S17.** (a) Adsorption isotherms of CO<sub>2</sub> for nmen-MOF at the indicated temperatures. (b) Logarithmic-scale plot of (a).

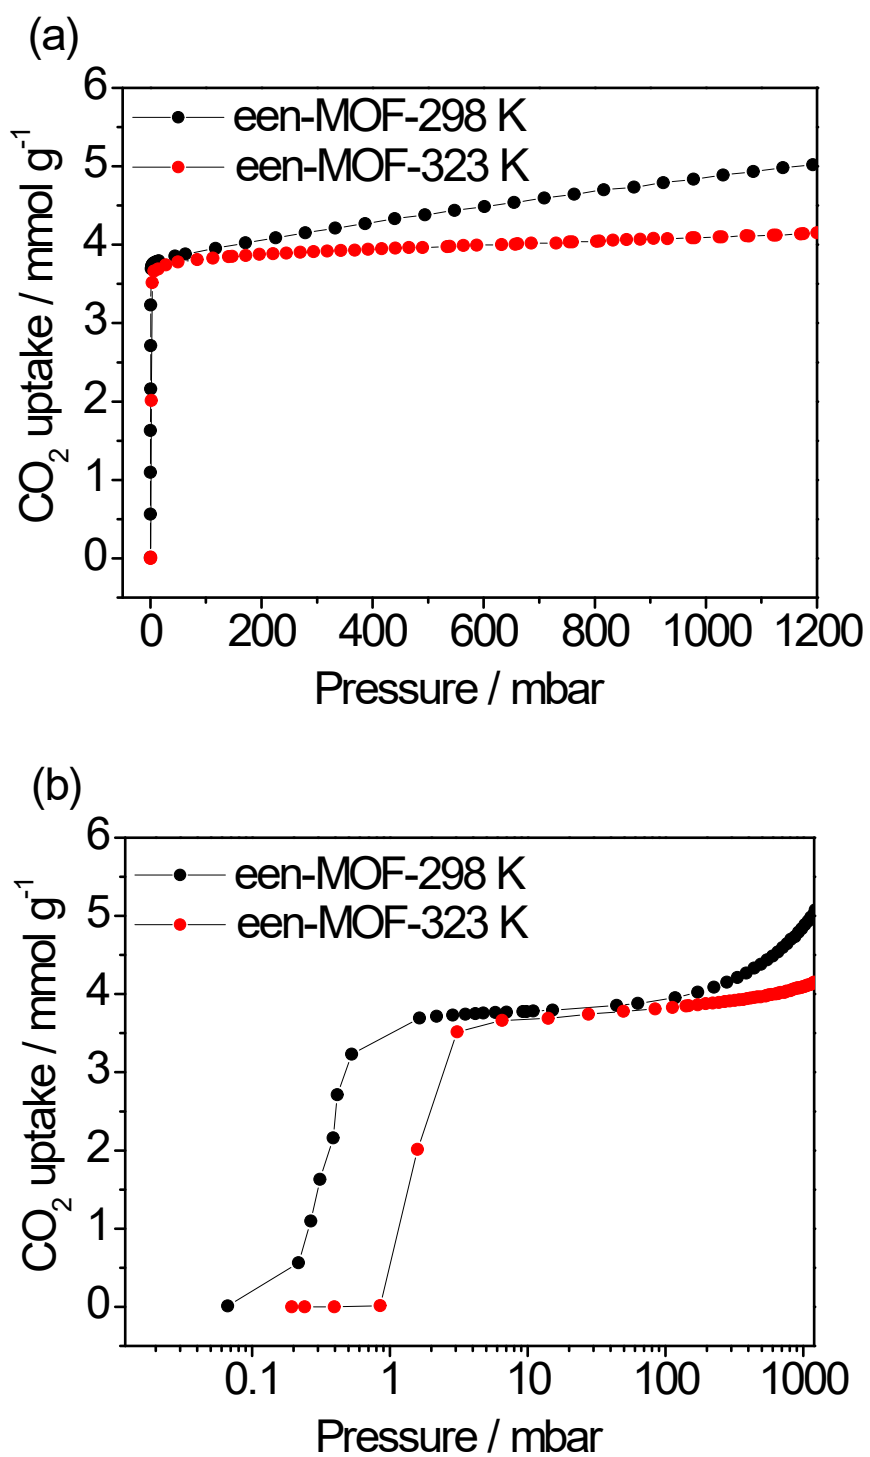

**Fig S18.** (a) Adsorption isotherms of CO<sub>2</sub> for een-MOF at the indicated temperatures. (b) Logarithmic-scale plot of (a).

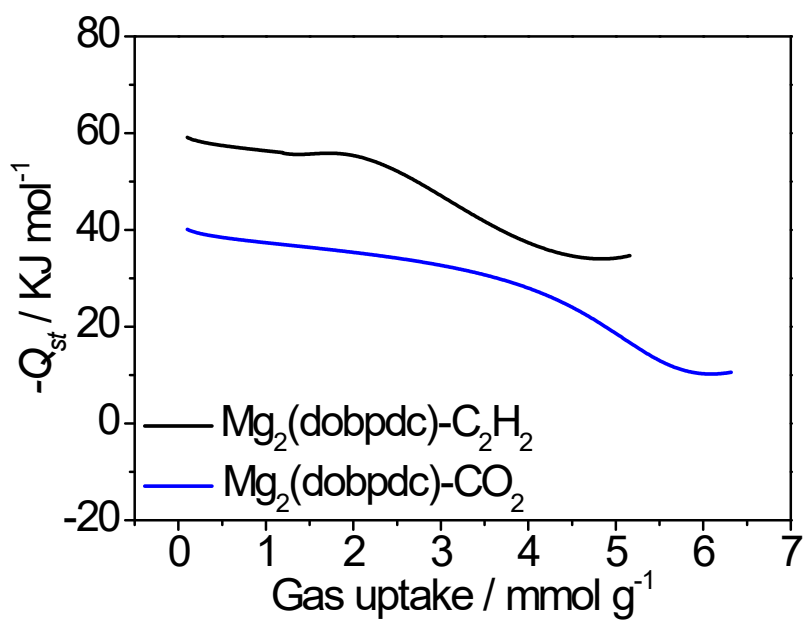

**Fig S19.** Isosteric heats of adsorption of  $\text{C}_2\text{H}_2$  and  $\text{CO}_2$  for  $\text{Mg}_2(\text{dobpdc})$ .



**Table S1.**  $-Q_{st}$  value of  $\text{CO}_2$  and  $\text{C}_2\text{H}_2$  for reported materials.

| Materials                                         | $-Q_{st}$ of $\text{CO}_2$<br>(KJ / mol) | $-Q_{st}$ of $\text{C}_2\text{H}_2$<br>(KJ / mol) | Ref.      |
|---------------------------------------------------|------------------------------------------|---------------------------------------------------|-----------|
| Mn(bdc)(dpe)                                      | 29.5                                     | 27.8                                              | 7         |
| SIFSIX-3-Ni                                       | 51                                       | 36.5                                              | 8         |
| CD-MOF-1                                          | 41                                       | 17                                                | 9         |
| CD-MOF-2                                          | 67.5                                     | 25                                                | 9         |
| $\text{Tm}_2(\text{OH-bdc})_2(\mu_3\text{-OH})_2$ | 32.7                                     | 26.0                                              | 10        |
| MUF-16                                            | 32                                       | 25.8                                              | 11        |
| PCP-NH <sub>2</sub> -ipa                          | 36.6                                     | 26.8                                              | 12        |
| PCP-NH <sub>2</sub> -bdc                          | 34.57                                    | 25.6                                              | 12        |
| Cd-NP                                             | 27.7                                     | NA                                                | 13        |
| Fe-MOF-74                                         | 30                                       | 45                                                | 14        |
| $\text{Mg}_2(\text{dobpdc})$                      | 40.1                                     | 59.1                                              | This work |
| en-MOF                                            | 71.2                                     | 22.3                                              | This work |
| nmen-MOF                                          | 62.32                                    | 23.9                                              | This work |
| een-MOF                                           | 68.77                                    | 23.4                                              | This work |

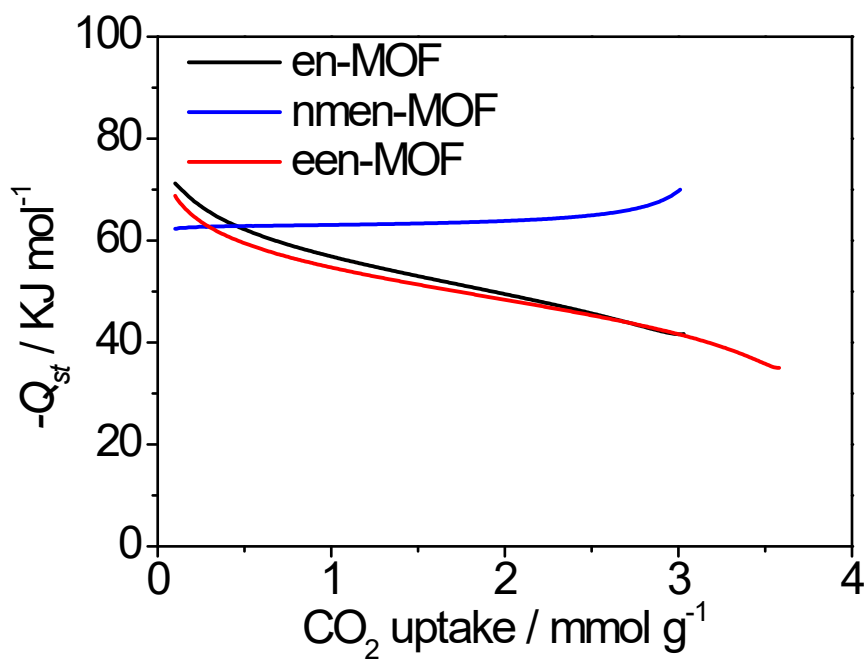

**Fig S20.** Isosteric heats of adsorption of  $\text{CO}_2$  for en-MOF, nmen-MOF, and een-MOF.

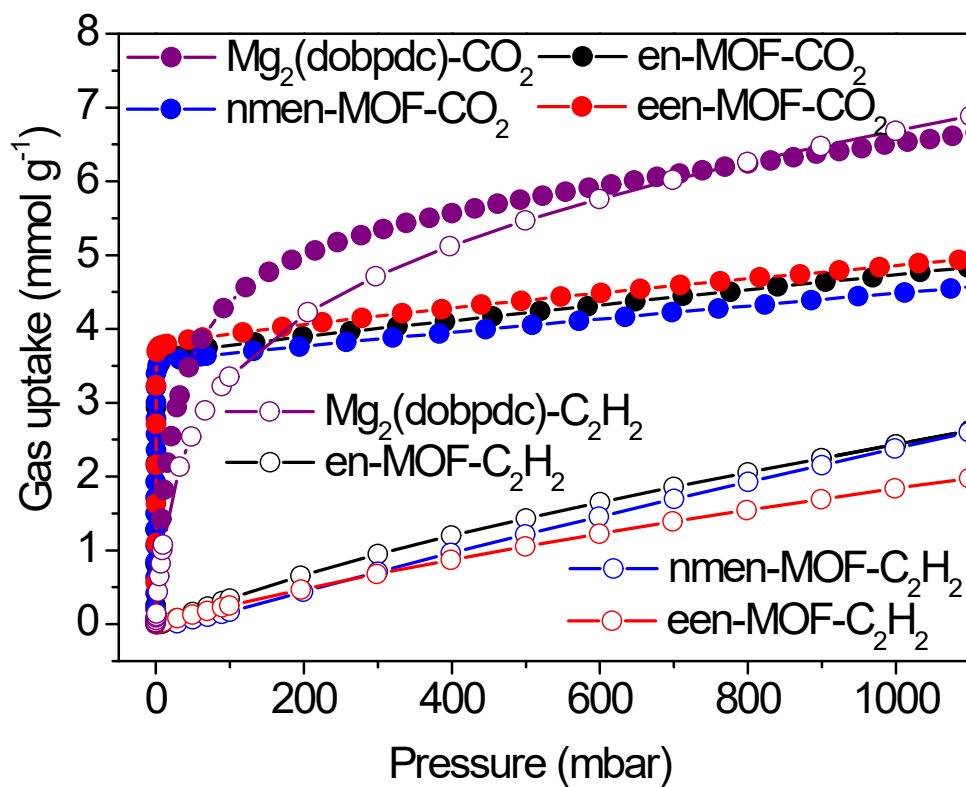

**Fig S21.** Adsorption isotherms of CO<sub>2</sub> and C<sub>2</sub>H<sub>2</sub> for Mg<sub>2</sub>(dobpdc), en-MOF, nmen-MOF, and een-MOF at 298 K.

**Table S2.** Comparison of CO<sub>2</sub> and C<sub>2</sub>H<sub>2</sub> uptake of CO<sub>2</sub>/C<sub>2</sub>H<sub>2</sub> for reported materials. CO<sub>2</sub> and C<sub>2</sub>H<sub>2</sub> adsorption values at 30 mbar were extracted from these references using a WebPlotDigitizer.

| Materials                                                               | T(K) | CO <sub>2</sub> uptake <sup>a</sup> | C <sub>2</sub> H <sub>2</sub> uptake <sup>b</sup> | Ref.      |
|-------------------------------------------------------------------------|------|-------------------------------------|---------------------------------------------------|-----------|
| Mn(bdc)(dpe)                                                            | 273  | 0.22/2.09                           | 0.32                                              | 7         |
| SIFSIX-3-Ni                                                             | 298  | 2.25/2.70                           | 3.30                                              | 8         |
| CD-MOF-1                                                                | 298  | 1.1/2.87                            | 2.23                                              | 9         |
| CD-MOF-2                                                                | 298  | 1.3/2.65                            | 2.03                                              | 9         |
| Tm <sub>2</sub> (OH-bdc) <sub>2</sub> (μ <sub>3</sub> -OH) <sub>2</sub> | 298  | 1.35/5.83                           | 2.10                                              | 10        |
| MUF-16                                                                  | 293  | 0.49/2.14                           | 0.18                                              | 11        |
| PCP-NH <sub>2</sub> -ipa                                                | 298  | 0.80/3.21                           | 1.93                                              | 12        |
| PCP-NH <sub>2</sub> -bdc                                                | 298  | 0.75/3.03                           | 1.90                                              | 12        |
| Cd-NP                                                                   | 298  | 0.36/2.59                           | 0.43                                              | 13        |
| en-MOF                                                                  | 298  | 3.64/4.48                           | 2.43                                              | This work |
| nmen-MOF                                                                | 298  | 3.58/4.73                           | 2.38                                              | This work |
| een-MOF                                                                 | 298  | 3.82/4.85                           | 1.84                                              | This work |

<sup>a</sup>Gravimetric uptake (mmol g<sup>-1</sup>) at 30 mbar/1000 mbar, except Mn(bdc)(dpe) at 30 mbar/91 mbar.

<sup>b</sup>Gravimetric uptake (mmol g<sup>-1</sup>) at 1000 mbar, except Mn(bdc)(dpe) at 91 mbar.

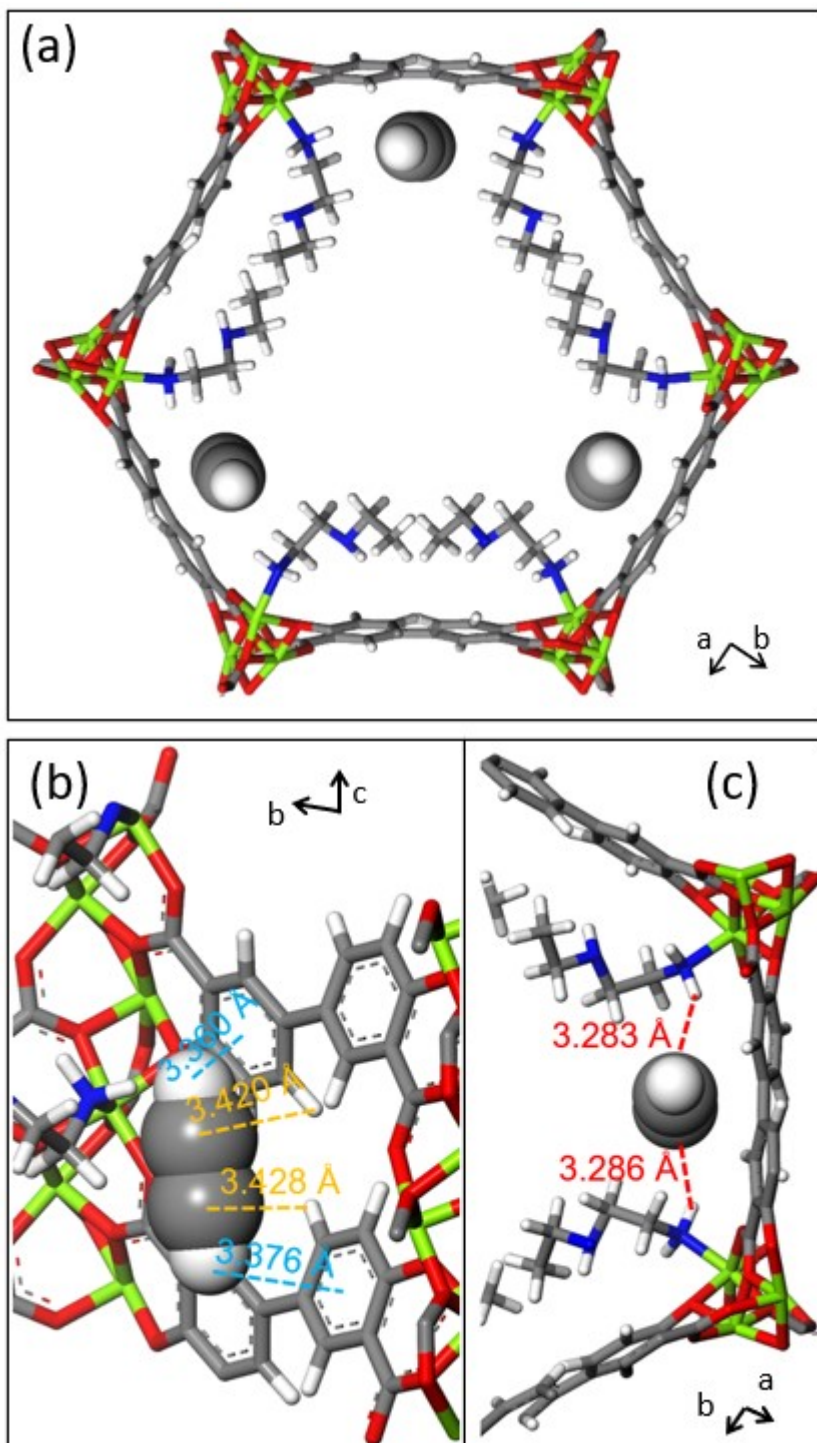

**Fig S22.** Grand canonical Monte Carlo (GCMC) simulations of  $C_2H_2$  adsorption in een-MOF. (a) View of the  $C_2H_2$  binding sites ( $C_2H_2$  molecules in space-filling mode) in een-MOF. (b) Interaction between  $C_2H_2$  and the ligand dobpdc<sup>4-</sup>. Blue and orange dotted lines represent the interactions between H of  $C_2H_2$  and the centroid of a phenyl ring, and the interactions between C of  $C_2H_2$  and H of the phenyl ring, respectively. (c) Interaction between  $C_2H_2$  and een groups. Red dotted lines represent the interaction between C of  $C_2H_2$  and H of een.

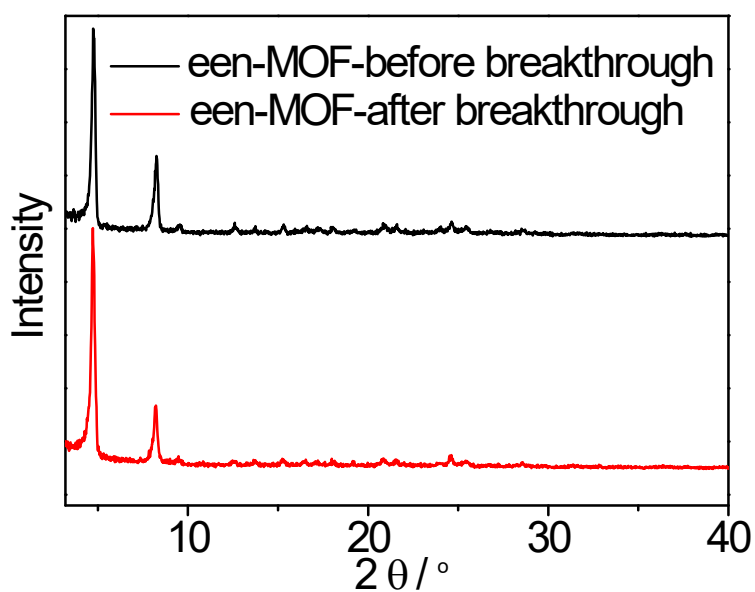

**Fig S23.** PXRD patterns of een-MOF before and after breakthrough experiments. een-MOF was regenerated at 140 °C for 1 h.

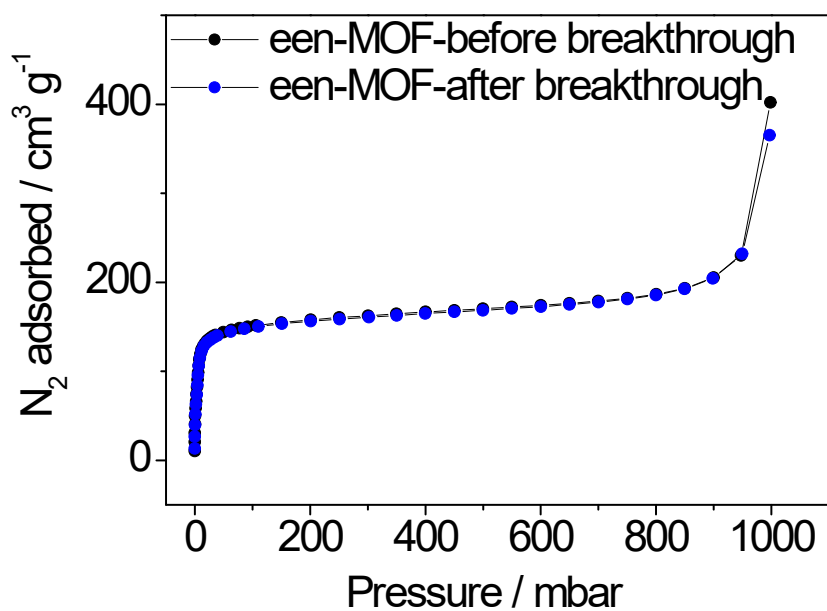

**Fig S24.** N<sub>2</sub> sorption isotherms for een-MOF before and after breakthrough experiments. een-MOF was regenerated at 140 °C for 1 h.

## References

1. T. M. McDonald, W. R. Lee, J. A. Mason, B. M. Wiers, C. S. Hong and J. R. Long, *J. Am. Chem. Soc.*, 2012, **134**, 7056-7065.
2. A. L. Myers and J. M. Prausnitz, *AIChE J*, 1965, **11**, 121-127.
3. L. Zhang, K. Jiang, Y. Yang, Y. Cui, B. Chen and G. Qian, *J. Solid State Chem.*, 2017, **255**, 102-107.
4. H. Pan, J. A. Ritter and P. B. Balbuena, *Langmuir*, 1998, **14**, 6323-6327.
5. , Sorption Module - Accelrys Inc. San Diego, 2011.
6. D. W. Kang, M. Kang, D. W. Kim, H. Kim, Y. H. Lee, H. Yun, J. H. Choe and C. S. Hong, *Adv. Sustainable Syst.*, 2020, **5**, 2000161.
7. M. L. Foo, R. Matsuda, Y. Hijikata, R. Krishna, H. Sato, S. Horike, A. Hori, J. Duan, Y. Sato, Y. Kubota, M. Takata and S. Kitagawa, *J. Am. Chem. Soc.*, 2016, **138**, 3022-3030.
8. K.-J. Chen, Hayley S. Scott, David G. Madden, T. Pham, A. Kumar, A. Bajpai, M. Lusi, Katherine A. Forrest, B. Space, John J. Perry and Michael J. Zaworotko, *Chem*, 2016, **1**, 753-765.
9. L. Li, J. Wang, Z. Zhang, Q. Yang, Y. Yang, B. Su, Z. Bao and Q. Ren, *ACS Appl. Mater. Interfaces*, 2019, **11**, 2543-2550.
10. D. Ma, Z. Li, J. Zhu, Y. Zhou, L. Chen, X. Mai, M. Liufu, Y. Wu and Y. Li, *J. Mater. Chem. A*, 2020, **8**, 11933-11937.
11. O. T. Qazvini, R. Babarao and S. G. Telfer, *Nat. Commun.*, 2021, **12**, 197.
12. Y. Gu, J. J. Zheng, K. I. Otake, M. Shivanna, S. Sakaki, H. Yoshino, M. Ohba, S. Kawaguchi, Y. Wang, F. Li and S. Kitagawa, *Angew. Chem. Int. Ed.*, 2021, **60**, 11688-11694.
13. Y. Xie, H. Cui, H. Wu, R. B. Lin, W. Zhou and B. Chen, *Angew. Chem. Int. Ed.*, 2021, **60**, 9604-9609.
14. A. Luna-Triguero, J. M. Vicent-Luna, R. M. Madero-Castro, P. Gomez-Alvarez and S. Calero, *ACS Appl. Mater. Interfaces*, 2019, **11**, 31499-31507.
